# Supplementary material
Source: HighWire-hosted journal article supplement (https://bmjopen.bmj.com/content/15/2/e089844)
Supplement: inline-supplementary-material-1 [file inline-supplementary-material-1.pdf]

**Table S1.** Demographic characteristics of study participants and their Knowledge, Attitude, and Practice scores

| Variables             | N (%)       | Knowledge score |       | Attitudes score |       | Practice score |       |
|-----------------------|-------------|-----------------|-------|-----------------|-------|----------------|-------|
|                       |             | Mean ± SD       | P*    | Mean ± SD       | P     | Mean ± SD      | P     |
| <b>Total</b>          | 522         | 16.24 ± 3.88    |       | 33.31 ± 3.32    |       | 28.69 ± 2.74   |       |
| <b>Age, years</b>     |             |                 | 0.385 |                 | 0.799 |                | 0.004 |
| 18-45                 | 125 (23.95) | 15.90 ± 3.73    |       | 33.48 ± 3.76    |       | 28.29 ± 3.58   |       |
| 46-60                 | 225 (43.10) | 16.20 ± 4.13    |       | 33.24 ± 3.32    |       | 28.48 ± 2.78   |       |
| > 60                  | 172 (32.95) | 16.53 ± 3.65    |       | 33.28 ± 2.98    |       | 29.25 ± 1.76   |       |
| <b>Gender</b>         |             |                 | 0.753 |                 | 0.596 |                | 0.276 |
| Male                  | 290 (55.56) | 16.19 ± 3.80    |       | 33.24 ± 3.12    |       | 28.81 ± 2.59   |       |
| Female                | 232 (44.44) | 16.30 ± 3.99    |       | 33.40 ± 3.57    |       | 28.54 ± 2.92   |       |
| <b>Marital status</b> |             |                 | 0.112 |                 | 0.828 |                | 0.090 |
| Married               | 434 (83.14) | 16.38 ± 3.90    |       | 33.35 ± 3.31    |       | 28.76 ± 2.64   |       |
| Unmarried             | 49 (9.39)   | 15.92 ± 3.36    |       | 33.14 ± 3.08    |       | 27.88 ± 3.69   |       |
| Divorced/Widowed      | 39 (7.47)   | 15.08 ± 4.13    |       | 33.08 ± 3.75    |       | 28.90 ± 2.36   |       |
| <b>Residence</b>      |             |                 | 0.615 |                 | 0.843 |                | 0.014 |
| Urban                 | 381 (72.99) | 16.26 ± 3.86    |       | 33.30 ± 3.24    |       | 28.90 ± 2.60   |       |
| Rural                 | 110 (21.07) | 16.34 ± 4.00    |       | 33.26 ± 3.64    |       | 28.05 ± 3.13   |       |

|                                        |             |               |   |              |              |       |
|----------------------------------------|-------------|---------------|---|--------------|--------------|-------|
| Suburban                               | 31 (5.94)   | 15.58<br>3.82 | ± | 33.65 ± 3.22 | 28.39 ± 2.69 |       |
| Education                              |             |               |   | 0.766        | 0.268        | 0.267 |
| Primary school and below               | 109 (20.88) | 15.97<br>4.25 | ± | 33.28 ± 3.42 | 28.72 ± 2.65 |       |
| Middle school                          |             | 16.22         | ± |              |              |       |
|                                        | 161 (30.84) | 3.83          |   | 33.35 ± 3.46 | 28.52 ± 3.12 |       |
| High school/Technical secondary school |             | 16.36         | ± |              |              |       |
|                                        | 134 (25.67) | 3.85          |   | 32.90 ± 3.28 | 28.94 ± 2.54 |       |
| Junior college/Undergraduate           |             | 16.44         | ± |              |              |       |
|                                        | 113 (21.65) | 3.65          |   | 33.81 ± 2.94 | 28.71 ± 2.37 |       |
| Postgraduate and above                 |             | 14.60         | ± |              |              |       |
|                                        | 5 (0.96)    | 4.34          |   | 32.20 ± 5.26 | 26.40 ± 4.39 |       |
| Work status                            |             |               |   | 0.336        | 0.836        | 0.002 |
| Unemployed/Layoff                      | 147 (28.16) | 16.46<br>3.73 | ± | 33.54 ± 3.23 | 28.61 ± 2.58 |       |
| Employed                               |             | 16.38         | ± |              |              |       |
|                                        | 60 (11.49)  | 3.66          |   | 33.43 ± 3.40 | 28.12 ± 3.28 |       |
| Retired                                |             | 16.27         | ± |              |              |       |
|                                        | 242 (46.36) | 3.82          |   | 33.20 ± 3.13 | 29.01 ± 2.17 |       |
| Self-employed/Freelance                |             | 16.00         | ± |              |              |       |
|                                        | 48 (9.20)   | 4.41          |   | 33.02 ± 3.56 | 28.94 ± 2.34 |       |
| Full-time househusband/housewife       |             | 14.72         | ± |              |              |       |
|                                        | 25 (4.79)   | 4.70          |   | 33.28 ± 4.88 | 26.96 ± 5.81 |       |
| Monthly per capita income, CNY         |             |               |   | 0.300        | 0.814        | 0.996 |
| <2000                                  |             | 15.92         | ± |              |              |       |
|                                        | 182 (34.87) | 4.03          |   | 33.30 ± 3.55 | 28.73 ± 2.87 |       |
| 2000-4999                              |             | 16.47         | ± |              |              |       |
|                                        | 219 (41.95) | 3.78          |   | 33.21 ± 3.06 | 28.67 ± 2.68 |       |

|                                                                    |             |             |   |              |              |        |
|--------------------------------------------------------------------|-------------|-------------|---|--------------|--------------|--------|
| 5000-9999                                                          |             | 16.57       | ± |              |              |        |
|                                                                    | 89 (17.05)  | 3.79        |   | 33.42 ± 3.54 | 28.66 ± 2.72 |        |
| ≥10000                                                             |             | 15.53       | ± |              |              |        |
|                                                                    | 32 (6.13)   | 3.98        |   | 33.78 ± 3.13 | 28.69 ± 2.71 |        |
| Medical insurance type                                             |             |             |   | <0.001       | <0.001       | <0.001 |
|                                                                    |             |             | 1 |              |              |        |
| Social medical insurance only                                      | 491 (94.06) | 16.35       | ± |              |              |        |
|                                                                    |             | 3.69        |   | 33.43 ± 3.16 | 28.75 ± 2.52 |        |
| Commercial medical insurance only                                  |             | 17.50       | ± |              |              |        |
|                                                                    | 2 (0.38)    | 0.71        |   | 36.00 ± 0.00 | 24.00 ± 8.49 |        |
| Both social and commercial medical insurance                       | 22 (4.21)   | 16.18       | ± | 31.73 ± 3.33 | 29.50 ± 1.57 |        |
|                                                                    |             | 3.96        |   |              |              |        |
| No medical insurance                                               | 7 (1.34)    | 8.14 ± 7.97 |   | 28.86 ± 8.40 | 23.57 ± 8.66 |        |
| Duration of the HD, years                                          |             |             |   | <0.001       | 0.344        | 0.014  |
|                                                                    |             |             | 1 |              |              |        |
| < 1                                                                |             | 15.10       | ± |              |              |        |
|                                                                    | 109 (20.88) | 4.57        |   | 33.16 ± 3.59 | 28.16 ± 2.85 |        |
| [1, 2)                                                             |             | 15.77       | ± |              |              |        |
|                                                                    | 70 (13.41)  | 4.15        |   | 33.03 ± 3.71 | 28.17 ± 4.08 |        |
| [2, 3)                                                             |             | 15.81       | ± |              |              |        |
|                                                                    | 54 (10.34)  | 4.54        |   | 32.80 ± 3.64 | 28.74 ± 2.65 |        |
| ≥3                                                                 |             | 16.86       | ± |              |              |        |
|                                                                    | 289 (55.36) | 3.25        |   | 33.53 ± 3.04 | 29.01 ± 2.25 |        |
| Participation in relevant education in fistulas care or management |             |             |   | <0.001       | 0.066        | 0.015  |
|                                                                    |             |             | 1 |              |              |        |
| Yes                                                                |             | 16.43       | ± |              |              |        |
|                                                                    | 493 (94.44) | 3.72        |   | 33.38 ± 3.28 | 28.76 ± 2.66 |        |
| No                                                                 | 29 (5.56)   | 12.97       | ± |              |              |        |
|                                                                    |             | 5.04        |   | 32.20 ± 3.84 | 27.48 ± 3.75 |        |

|                                                      |             |               |   |              |              |       |
|------------------------------------------------------|-------------|---------------|---|--------------|--------------|-------|
| Guidance on fistula care received from               |             |               |   | <0.001       | 0.014        | 0.002 |
| Doctor                                               | 55 (10.54)  | 16.27<br>3.52 | ± | 33.42 ± 3.29 | 29.51 ± 1.87 |       |
| Nurse                                                | 57 (10.92)  | 14.05<br>5.31 | ± | 32.04 ± 4.80 | 27.82 ± 4.00 |       |
| Doctor and nurse                                     | 396 (75.86) | 16.63<br>3.52 | ± | 33.51 ± 3.00 | 28.75 ± 2.48 |       |
| Not received in hospital                             | 14 (2.68)   | 13.79<br>4.71 | ± | 32.57 ± 3.90 | 27.21 ± 4.77 |       |
| Arteriovenous fistulas currently used                |             |               |   | 0.028        | 0.197        | 0.348 |
| The first one                                        | 425 (81.42) | 16.06<br>3.86 | ± | 33.40 ± 3.30 | 28.74 ± 2.66 |       |
| The second or more                                   | 97 (18.58)  | 17.02<br>3.92 | ± | 32.92 ± 3.40 | 28.45 ± 3.08 |       |
| Lifespan of the current arteriovenous fistula, years |             |               |   | 0.008        | 0.060        | 0.215 |
| < 1                                                  | 127 (24.33) | 15.49<br>4.39 | ± | 33.20 ± 3.50 | 28.39 ± 2.63 |       |
| [1, 2)                                               | 76 (14.56)  | 16.00<br>3.51 | ± | 33.33 ± 2.75 | 28.68 ± 2.90 |       |
| [2, 3)                                               | 57 (10.92)  | 15.65<br>5.03 | ± | 32.28 ± 3.46 | 28.30 ± 3.31 |       |
| ≥3                                                   | 262 (50.19) | 16.80<br>3.33 | ± | 33.58 ± 3.33 | 28.92 ± 2.61 |       |
| Other family members on HD                           |             |               |   | 0.039        | 0.848        | 0.195 |
| Yes                                                  | 65 (12.45)  | 17.17<br>3.11 | ± | 33.38 ± 3.25 | 28.28 ± 3.07 |       |
| No                                                   | 457 (87.55) | 16.11         | ± | 33.30 ± 3.34 | 28.75 ± 2.69 |       |

|                                                                                                                                     |
|-------------------------------------------------------------------------------------------------------------------------------------|
| 3.97                                                                                                                                |
| *Independent t-test was used for comparisons between two groups, and one-way ANOVA was used for comparisons between multiple groups |

| Questionnaire                                                                                         |                                                                                                                                                              |
|-------------------------------------------------------------------------------------------------------|--------------------------------------------------------------------------------------------------------------------------------------------------------------|
| Knowledge, attitude, and practice toward arteriovenous fistulas among uremic patients on hemodialysis |                                                                                                                                                              |
| Demographic information                                                                               |                                                                                                                                                              |
| 1. Age, years                                                                                         |                                                                                                                                                              |
| 2. Gender                                                                                             | a. Male<br>b. Female                                                                                                                                         |
| 3. Marital status                                                                                     | a. Unmarried<br>b. Married<br>c. Divorced/Widowed                                                                                                            |
| 4. Residence                                                                                          | a. Rural<br>b. Urban<br>c. Suburban                                                                                                                          |
| 5. Education                                                                                          | a. Primary school and below<br>b. Middle school<br>c. High school/Technical secondary school<br>d. Junior college/Undergraduate<br>e. Postgraduate and above |
| 6. Work status                                                                                        | a. Employed<br>b. Unemployed/Layoff<br>c. Retired<br>d. Self-employed/Freelance<br>e. Full-time househusband/housewife                                       |
| 7. Monthly per capita income, CNY                                                                     | a. <2000<br>b. 2000-4999<br>c. 5000-9999<br>d. ≥10000                                                                                                        |

|                                                                        |                                                                                                                                                        |
|------------------------------------------------------------------------|--------------------------------------------------------------------------------------------------------------------------------------------------------|
| 8. Medical insurance type                                              | a. Social medical insurance only<br>b. Commercial medical insurance only<br>c. Both social and commercial medical insurance<br>d. No medical insurance |
| 9. Duration of the HD, years                                           | a. < 1<br>b. [1, 2)<br>c. [2, 3)<br>d. ≥3                                                                                                              |
| 10. Participation in relevant education in fistulas care or management | a. Yes<br>b. No                                                                                                                                        |
| 11. Guidance on fistula care received from                             | a. Doctor<br>b. Nurse<br>c. Doctor and nurse<br>d. Not received in hospital                                                                            |
| 12. Arteriovenous fistulas currently used                              | a. The first one<br>b. The second or more                                                                                                              |
| 13. Lifespan of the current arteriovenous fistula, years               | a. < 1<br>b. [1, 2)<br>c. [2, 3)<br>d. ≥3                                                                                                              |
| 14. Other family members on HD                                         | a. Yes<br>b. No                                                                                                                                        |

Knowledge

|                                                                                                                                                                                                    |              |                   |               |
|----------------------------------------------------------------------------------------------------------------------------------------------------------------------------------------------------|--------------|-------------------|---------------|
| 1. For the first hemodialysis, a central venous catheter should be chosen instead of fistulas.                                                                                                     | a. Correct   | b. Wrong          | c. Unclear    |
| 2. A correct range of blood pressure and hemoglobin control in blood will help prolong the fistulas' lifespan.                                                                                     | a. Know well | b. Partially know | c. Don't know |
| 3. If anticoagulation medication is not taken on time as prescribed by the doctor, it will affect the lifespan of the fistulas to some extent.                                                     | a. Know well | b. Partially know | c. Don't know |
| 4. Excessive compression of the fistulas at the end of hemodialysis can reduce the lifespan of the fistulas to some extent.                                                                        | a. Know well | b. Partially know | c. Don't know |
| 5. The weight gain of more than 5% of dry weight during the hemodialysis interval will affect the fistulas' lifespan.                                                                              | a. Know well | b. Partially know | c. Don't know |
| 6. The arm on the side of the fistula should not be used for blood pressure measurement, intravenous infusion and blood collection, heavy lifting, or bearing pressure.                            | a. Know well | b. Partially know | c. Don't know |
| 7. The vessels of the fistulas should not be used for anything other than hemodialysis and emergency rescue.                                                                                       | a. Know well | b. Partially know | c. Don't know |
| 8. Daily inspection of the arteriovenous fistulas by the patient/families and at least one palpation or auscultation is an effective measure to detect the possible problems in fistulas promptly. | a. Know well | b. Partially know | c. Don't know |
| 9. Keeping the skin on the side of the fistula intact and clean, especially by effectively washing the skin before puncture, helps to prevent local skin infections in the fistulas.               | a. Know well | b. Partially know | c. Don't know |
| 10. In case of a fear of or intolerance for punctures, you will inform the healthcare provider to choose another puncture option that suits you.                                                   | a. Know well | b. Partially know | c. Don't know |
| 11. For the first hemodialysis, fistulas should be chosen instead of a central venous catheter.                                                                                                    | a. Correct   | b. Wrong          | c. Unclear    |

Attitude

|                                                         |             |          |            |             |             |
|---------------------------------------------------------|-------------|----------|------------|-------------|-------------|
| 1. The lifespan of the arteriovenous fistulas is mainly | a. Strongly | b. Agree | c. Neutral | d. Disagree | e. Strongly |
|---------------------------------------------------------|-------------|----------|------------|-------------|-------------|



|                                                                                                                                                                                                                                                                       |          |          |          |            |             |                      |
|-----------------------------------------------------------------------------------------------------------------------------------------------------------------------------------------------------------------------------------------------------------------------|----------|----------|----------|------------|-------------|----------------------|
| determined by the material used, and there is little influence by how it is cared for.                                                                                                                                                                                | agree    |          |          |            |             | disagree             |
| 2. For the care of arteriovenous fistulas, keeping your blood pressure within the range recommended for your age is important.                                                                                                                                        | a. agree | Strongly | b. Agree | c. Neutral | d. Disagree | e. Strongly disagree |
| 3. It is important to use anticoagulants as prescribed by your doctor to keep the fistulas flowing.                                                                                                                                                                   | a. agree | Strongly | b. Agree | c. Neutral | d. Disagree | e. Strongly disagree |
| 4. It is necessary to check your fistulas at least once every day.                                                                                                                                                                                                    | a. agree | Strongly | b. Agree | c. Neutral | d. Disagree | e. Strongly disagree |
| 5. Is it important to wash the skin around the fistula before each puncture to prevent local infection at the site?                                                                                                                                                   | a. agree | Strongly | b. Agree | c. Neutral | d. Disagree | e. Strongly disagree |
| 6. It is the patient's responsibility to decide on the puncture site with the nurse for each puncture.                                                                                                                                                                | a. agree | Strongly | b. Agree | c. Neutral | d. Disagree | e. Strongly disagree |
| 7. As long as it is a one-time success and has no effect on the lifespan of the fistulas, there is no matter how many years of work experience the nurses have, and there is no need to insist on a nurse with many years of work experience to perform the puncture. | a. agree | Strongly | b. Agree | c. Neutral | d. Disagree | e. Strongly disagree |
| 8. As long as the place is right, the different ways of puncture (rope ladder cannulation, buttonhole cannulation, area cannulation) have no direct impact on the lifespan of the fistulas.                                                                           | a. agree | Strongly | b. Agree | c. Neutral | d. Disagree | e. Strongly disagree |
| 9. The level of pain experienced by the patient during a puncture is one of the most important criteria for evaluating the puncture skills of nurses.                                                                                                                 | a. agree | Strongly | b. Agree | c. Neutral | d. Disagree | e. Strongly disagree |
| Practice                                                                                                                                                                                                                                                              |          |          |          |            |             |                      |

|                                                                                                                                                                                           |                        |                        |               |                            |                   |
|-------------------------------------------------------------------------------------------------------------------------------------------------------------------------------------------|------------------------|------------------------|---------------|----------------------------|-------------------|
| 1. You will contact and inform your healthcare provider if there is redness, warmth, pain, swelling or purulent discharge on the skin around the fistula.                                 | a. Completely obedient | b. Relatively obedient | c. Moderately | d. Relatively not obedient | e. Never obedient |
| 2. You will contact and inform your healthcare provider if there are any abnormalities during hemodialysis, such as weakness or loss of pulsation in the blood vessels near your fistula. | a. Completely obedient | b. Relatively obedient | c. Moderately | d. Relatively not obedient | e. Never obedient |
| 3. You would not use the arm on the fistula's side to draw blood or intravenous infusions.                                                                                                | a. Completely obedient | b. Relatively obedient | c. Moderately | d. Relatively not obedient | e. Never obedient |
| 4. You would not use the arm on the fistula's side to lift heavy objects.                                                                                                                 | a. Completely obedient | b. Relatively obedient | c. Moderately | d. Relatively not obedient | e. Never obedient |
| 5. You would not use the arm on the fistula's side to be under pressure; for example, do not use it to measure blood pressure and sleep on it.                                            | a. Completely obedient | b. Relatively obedient | c. Moderately | d. Relatively not obedient | e. Never obedient |
| 6. After hemodialysis, if you find bleeding at the puncture site of your fistulas on your way home or at home, you can handle it without fear or panic.                                   | a. Completely obedient | b. Relatively obedient | c. Moderately | d. Relatively not obedient | e. Never obedient |
